# Supplementary material
Source: PubMed Central journal article supplement (PMC4076132)
Supplement: 10.3163.1536-5050.102.3.013.sg001.pdf [file 10.3163.1536-5050.102.3.013.sg001.pdf]

## **Evidence-based practice instruction by faculty members and librarians in North American optometry and ophthalmology programs**

**Katherine A. MacDonald, BA, BSc, MLIS; Patricia K. Hrynchak, OD, FAAO; Marlee M. Spafford, OD, PhD, FAAO**

### **APPENDIX A**

#### **Evidence-based clinical practice instruction in optometry and ophthalmology programs survey**

Welcome and thank you in advance for completing the survey.

As indicated by the email information letter, the researchers who created this survey are interested in how you teach evidence-based clinical practice (EBCP). The term EBCP will be used in this survey to denote all variations in terminology used by different health care professions including evidence-based medicine (EBM), evidence-based practice (EBP), evidence-informed practice (EIP). The definition of EBCP we will use is the standard EBM definition:

“the conscientious, explicit and judicious use of current best evidence in making decisions about the care of individual patients. The practice of evidence-based medicine requires the integration of individual clinical expertise with the best available external clinical evidence from systematic research and our patient’s unique values and circumstances.”

Source: Straus SE, Richardson WS, Glasziou P, Haynes RB. Evidence-based medicine: how to practice and teach EBM. 3rd ed. Edinburgh, Scotland, UK: Elsevier Churchill Livingstone; 2005.

The five steps of EBCP are:

Step 1: Ask: converting the need for information into an answerable question

Step 2: Acquire: finding the best evidence with which to answer the question

Step 3: Appraise: critically appraising the evidence for validity, impact, and applicability

Step 4: Apply: integrating the critically appraised evidence with clinical expertise and patient values, etc.

Step 5: Assess: evaluating our own effectiveness

Source: Straus SE, Richardson WS, Glasziou P, Haynes RB. Evidence-based medicine: how to practice and teach EBM. 3rd ed. Edinburgh, Scotland, UK: Elsevier Churchill Livingstone; 2005.

Prasad K. Fundamentals of evidence-based medicine: basic concepts in easy language. New Delhi, India: Meeta Publishers; 2007.

**Part A: Background information**

1. What is your educational background? (check as many as apply)

|                                                                                                     |  |
|-----------------------------------------------------------------------------------------------------|--|
| Master of library and information science, master of information science, master of library science |  |
| Library technician                                                                                  |  |
| Optometrist                                                                                         |  |
| PhD                                                                                                 |  |
| Family physician                                                                                    |  |
| Specialist physician (e.g., ophthalmologist)                                                        |  |
| Resident (family medicine or specialty training)                                                    |  |
| Graduate student (master or PhD)                                                                    |  |
| Other                                                                                               |  |

If other, please describe...

SKIP LOGIC: Depending on the response to the answer of question 1, the respondent will be taken to one of two surveys that ask the same questions but may have been slightly adapted to suit the language or roles of one of two groups: librarians or faculty/staff.  
**Faculty /staff version** – see below

**Faculty version**

**About you**

2. In what kind of program do you teach?

|                                     |  |
|-------------------------------------|--|
| Optometry                           |  |
| Ophthalmology                       |  |
| Other (e.g., medical undergraduate) |  |

If other, please describe...

3. How long have you been teaching as a faculty member/lecturer/clinical supervisor/other?  
\_\_\_\_\_years

If other, please describe .....

**About your academic institution**

4. Which one of the following describes your program?

|                                                        |  |
|--------------------------------------------------------|--|
| An professional program within a university or college |  |
| A standalone educational institution                   |  |
| Other                                                  |  |

If other, please describe...

---

**About your library**

5. How would you best describe your library? [check one box only]

|                                                               |  |
|---------------------------------------------------------------|--|
| Discipline/department specific library (e.g., optometry only) |  |
| Multidisciplinary health sciences library                     |  |
| Multidisciplinary science library                             |  |
| General academic library                                      |  |
| Other                                                         |  |

If other please describe....

---

6. Approximately how many professional students are involved within your program?  
\_\_\_\_\_ number of students

7. Are you involved in clinical patient care?      Yes      No

8. What is your educational background with respect to learning the process of EBCP [check all that apply]?

|                                                                                                                |  |
|----------------------------------------------------------------------------------------------------------------|--|
| It was part of my professional training program                                                                |  |
| I have taken courses on EBCP as part of a postgraduate degree                                                  |  |
| I have taken a course or courses in the area outside of a degree program for personal/professional development |  |
| Self-directed learning                                                                                         |  |
| None                                                                                                           |  |
| Other                                                                                                          |  |

If other, please describe...

---

9. Do you teach *any of the steps* of the EBCP process?      Yes      No

|                                                                                                                                                               |
|---------------------------------------------------------------------------------------------------------------------------------------------------------------|
| If <i>Yes</i> continue to question #10 (below) and complete sections B, C, D, E, F<br>If <i>No</i> please go to <i>page # 9</i> and complete sections G and H |
|---------------------------------------------------------------------------------------------------------------------------------------------------------------|

**Part B: Teaching evidence-based clinical practice (EBCP)**

10. Which aspects of the EBCP process do you teach? [check all that apply]

|                                                                                                              |  |
|--------------------------------------------------------------------------------------------------------------|--|
| Step 1: Ask: converting the need for information into an answerable question                                 |  |
| Step 2: Acquire: finding the best evidence with which to answer the question                                 |  |
| Step 3: Appraise: critically appraising the evidence for validity, impact and applicability                  |  |
| Step 4: Apply: integrating the critically appraised evidence with clinical expertise and patient values etc. |  |
| Step 5: Assess: evaluating your own effectiveness                                                            |  |
| Other                                                                                                        |  |

If other, please describe...

11. How often do you teach EBCP to the following learners? [check all that apply]

|                                          | Frequently | Occasionally | Rarely | Never |
|------------------------------------------|------------|--------------|--------|-------|
| Optometry students                       |            |              |        |       |
| Medical students (pregraduate learners)  |            |              |        |       |
| Ophthalmology residents                  |            |              |        |       |
| Other medical residents and fellows      |            |              |        |       |
| Graduate students (master and PhD level) |            |              |        |       |
| Faculty members                          |            |              |        |       |
| Continuing education participants        |            |              |        |       |
| Other                                    |            |              |        |       |

If other, please list...

**Part C: How and where you teach EBCP**

12. Indicate the frequency that you use the following formats to teach EBCP.

|                                                                                                              | Frequently | Occasionally | Rarely | Never |
|--------------------------------------------------------------------------------------------------------------|------------|--------------|--------|-------|
| As part of a course (face-to-face or online)                                                                 |            |              |        |       |
| A workshop not linked to a specific course but linked to a program (e.g., milestone for program requirement) |            |              |        |       |
| Via an independent workshop that students voluntarily take with no credit/requirement attached               |            |              |        |       |
| One-on-one instruction/consultation                                                                          |            |              |        |       |
| Continuing education course                                                                                  |            |              |        |       |
| Other                                                                                                        |            |              |        |       |

If other, please describe...

13. In total, how many hours do you spend teaching EBCP in a year?

|                   |  |
|-------------------|--|
| Less than 2 hours |  |
| 2-5 hours         |  |
| 6-10 hours        |  |
| 11-15 hours       |  |
| 16-20 hours       |  |
| 21+ hours         |  |
| Other             |  |

If other, please describe...

14. How often do you teach EBCP in the following settings?

|                                                              | Frequently | Occasionally | Rarely | Never |
|--------------------------------------------------------------|------------|--------------|--------|-------|
| Large lecture hall/large classroom (>100 seats)              |            |              |        |       |
| Small classroom (30-100 seats)                               |            |              |        |       |
| Seminar room (1-29 seats)                                    |            |              |        |       |
| Computer lab                                                 |            |              |        |       |
| Office consultation                                          |            |              |        |       |
| Virtual (web-based/online/remote/course management software) |            |              |        |       |
| Clinical setting                                             |            |              |        |       |
| Other                                                        |            |              |        |       |

If other, please list...

15. How often do you use the following instructional methods when teaching EBCP?

|                                                        | Frequently | Occasionally | Rarely | Never |
|--------------------------------------------------------|------------|--------------|--------|-------|
| Lecture                                                |            |              |        |       |
| Small group problem-based learning                     |            |              |        |       |
| Small group case-based learning                        |            |              |        |       |
| Discussion within in lecture                           |            |              |        |       |
| Case discussion (e.g., grand rounds)                   |            |              |        |       |
| Journal club                                           |            |              |        |       |
| Live demonstration of tools, resources, processes      |            |              |        |       |
| Interactive session (e.g., clickers, think-pair-share) |            |              |        |       |
| Practical sessions: hands-on computer lab exercises    |            |              |        |       |
| Tutorials, handouts, and guides (print or electronic)  |            |              |        |       |

|                                                        |  |  |  |  |
|--------------------------------------------------------|--|--|--|--|
| Individualized instruction                             |  |  |  |  |
| Formal mentor/coach/preceptor built into program       |  |  |  |  |
| During the course of clinical care in clinical setting |  |  |  |  |
| Other                                                  |  |  |  |  |

If other, please describe...

16. How often do you use *live* web-based instructional tools when teaching EBCP?

|                           | Frequently | Occasionally | Rarely | Never |
|---------------------------|------------|--------------|--------|-------|
| Webinar/videoconferencing |            |              |        |       |
| Chat                      |            |              |        |       |
| Smartboards               |            |              |        |       |
| Other                     |            |              |        |       |

If other, please describe...

17. How often do you use *any time* web-based instructional tools when teaching EBCP?

|                                                             | Frequently | Occasionally | Rarely | Never |
|-------------------------------------------------------------|------------|--------------|--------|-------|
| Online tutorials/modules                                    |            |              |        |       |
| Discussion boards                                           |            |              |        |       |
| Course management software (e.g., Angel, WebCT, BlackBoard) |            |              |        |       |
| Email or email discussion lists                             |            |              |        |       |
| Streaming video or screencasts                              |            |              |        |       |
| Other                                                       |            |              |        |       |

If other, please describe...

18. Have you created any teaching aids or tools to assist in the teaching of EBCP? [check all that apply]

|                                 |  |
|---------------------------------|--|
| Question development worksheets |  |
| Search strategy worksheets      |  |
| Critical appraisal worksheets   |  |
| EBCP resource lists             |  |
| EBCP subject guides             |  |
| Other                           |  |

If other, please describe...

19. What are your preferred reference sources or textbooks?

**Part D: Instructional collaboration**

20. How often are the following individuals involved with you in teaching EBCP?

|                                                    | Frequently | Occasionally | Rarely | Never |
|----------------------------------------------------|------------|--------------|--------|-------|
| Faculty member(s)                                  |            |              |        |       |
| Librarian(s)                                       |            |              |        |       |
| Someone other than a faculty member or a librarian |            |              |        |       |

If someone other than a faculty member or a librarian, please describe...

---

21. Identify any campus support services you have accessed to help your course development in the teaching of EBCP. [check all that apply]

|                                           |  |
|-------------------------------------------|--|
| Teaching Support Centre                   |  |
| Instructional Technologies Support Centre |  |
| Other                                     |  |

If other, please describe...

---

22. How often do you engage with librarian(s) with respect to teaching EBCP?

|                                                                                                                       | Frequently | Occasionally | Rarely | Never |
|-----------------------------------------------------------------------------------------------------------------------|------------|--------------|--------|-------|
| You co-teach in classrooms or computer labs                                                                           |            |              |        |       |
| You discuss course structure, formats, approaches, and content (assignments, etc.) with librarian(s) outside of class |            |              |        |       |
| You request librarian(s) to teach specific sessions on specific topics and are not present in class                   |            |              |        |       |
| You teach together in the clinical setting                                                                            |            |              |        |       |
| Other                                                                                                                 |            |              |        |       |

If other, please describe...

---

23. Do you have any additional comments on engaging with librarians with respect to teaching EBCP?

---

**Part E: Assessment**

24. How often do you use the following strategies to assess student learning with respect to EBCP?

|                                                                                                                                                                                                               | Frequently | Occasionally | Rarely | Never |
|---------------------------------------------------------------------------------------------------------------------------------------------------------------------------------------------------------------|------------|--------------|--------|-------|
| Critically appraised topic (CAT) reports                                                                                                                                                                      |            |              |        |       |
| Case study reports (e.g., grand rounds, journal club)                                                                                                                                                         |            |              |        |       |
| Library research assignments involving self-evaluation of research process and skills                                                                                                                         |            |              |        |       |
| Questions on final examinations (multiple choice/short answer/essay)                                                                                                                                          |            |              |        |       |
| Quizzes                                                                                                                                                                                                       |            |              |        |       |
| EBCP worksheets                                                                                                                                                                                               |            |              |        |       |
| Critical appraisal exercises                                                                                                                                                                                  |            |              |        |       |
| Part of clinical examinations (e.g., one task in a 10-step clinical exam—involves being marked on the search and appraisal done to make a clinical decision with respect to a case of a standardized patient) |            |              |        |       |
| Questionnaire on clinical behaviours/attitudes                                                                                                                                                                |            |              |        |       |
| Portfolios                                                                                                                                                                                                    |            |              |        |       |
| Observation of clinical practices                                                                                                                                                                             |            |              |        |       |
| Other                                                                                                                                                                                                         |            |              |        |       |

If other, please describe...

**Part F: School/program support for EBCP**

25. Please indicate your degree of agreement or disagreement with the following:

|                                                                                                      | Strongly agree | Agree | Somewhat agree | Somewhat disagree | Disagree | Strongly disagree | Don't know |
|------------------------------------------------------------------------------------------------------|----------------|-------|----------------|-------------------|----------|-------------------|------------|
| EBCP is formally integrated into the mission statements, goals, and objectives of the program.       |                |       |                |                   |          |                   |            |
| EBCP is formally integrated into the curriculum as a milestone or some other graduation requirement. |                |       |                |                   |          |                   |            |



|                                                                                                                                                                 |  |  |  |  |  |  |  |
|-----------------------------------------------------------------------------------------------------------------------------------------------------------------|--|--|--|--|--|--|--|
| EBCP is formally part of the learning objectives of one or more courses.                                                                                        |  |  |  |  |  |  |  |
| EBCP is informally taught in one or more courses but at the discretion of faculty (i.e., it is not formally mandated and therefore can be removed from course). |  |  |  |  |  |  |  |
| EBCP is formally integrated into the learning objectives of clinics and taught by clinical supervisors during clinical interactions with students.              |  |  |  |  |  |  |  |
| EBCP is taught by clinical supervisors, at their own discretion, during clinical interactions with students.                                                    |  |  |  |  |  |  |  |
| EBCP is taught in the library during reference/consultation sessions.                                                                                           |  |  |  |  |  |  |  |

If none of the above apply, please comment...

Thank you for completing the survey.

Please click the Finish button to submit the survey.

**Part G: For those who answered *no* to the question #10 (whether or not they taught any part of the EBCP process)**

1. If you do not teach any part of the EBCP process, do you teach students another approach to finding and/or using research to support their clinical decision making?

Yes                      No

2. What do you teach?

3. How often do you teach this approach to the following learners? [check all that apply]

|                                         | Frequently | Occasionally | Rarely | Never |
|-----------------------------------------|------------|--------------|--------|-------|
| Optometry students                      |            |              |        |       |
| Medical students (pregraduate learners) |            |              |        |       |
| Ophthalmology residents                 |            |              |        |       |
| Other medical residents and fellows     |            |              |        |       |
| Graduate students (master & PhD level)  |            |              |        |       |
| Faculty members                         |            |              |        |       |
| Continuing education participants       |            |              |        |       |
| Other                                   |            |              |        |       |

If other, please describe...

---

**Part H: How and where you teach**

4. Indicate the frequency that you use the following formats to teach this approach.

|                                                                                                              | Frequently | Occasionally | Rarely | Never |
|--------------------------------------------------------------------------------------------------------------|------------|--------------|--------|-------|
| As part of a course (face-to-face or online)                                                                 |            |              |        |       |
| A workshop not linked to a specific course but linked to a program (e.g., milestone for program requirement) |            |              |        |       |
| Via an independent workshop that students voluntarily take with no credit/requirement attached               |            |              |        |       |
| One-on-one instruction/consultation                                                                          |            |              |        |       |
| Continuing education course                                                                                  |            |              |        |       |
| Other                                                                                                        |            |              |        |       |

If other, please describe...

---

5. In total, how many hours do you spend teaching this approach per year?

|                   |  |
|-------------------|--|
| Less than 2 hours |  |
| 2-5 hours         |  |
| 6-10 hours        |  |
| 11-15 hours       |  |
| 16-20 hours       |  |
| 21+ hours         |  |
| Other             |  |

If other, please describe...

---

6. How often do you teach in the following settings when teaching this approach?

|                                                              | Frequently | Occasionally | Rarely | Never |
|--------------------------------------------------------------|------------|--------------|--------|-------|
| Large lecture hall/large classroom (>100 seats)              |            |              |        |       |
| Small classroom (30–100 seats)                               |            |              |        |       |
| Seminar room (1–29 seats)                                    |            |              |        |       |
| Computer lab                                                 |            |              |        |       |
| Office consultation                                          |            |              |        |       |
| Virtual (web-based/online/remote/course management software) |            |              |        |       |
| Clinical setting                                             |            |              |        |       |
| Other                                                        |            |              |        |       |

If other, please list...

---

7. How often do you use the following instructional methods when teaching this approach?

|                                                        | Frequently | Occasionally | Rarely | Never |
|--------------------------------------------------------|------------|--------------|--------|-------|
| Lecture                                                |            |              |        |       |
| Small group problem-based learning                     |            |              |        |       |
| Small group case-based learning                        |            |              |        |       |
| Discussion within in lecture                           |            |              |        |       |
| Case discussion (e.g., grand rounds)                   |            |              |        |       |
| Journal club                                           |            |              |        |       |
| Live demonstration of tools, resources, processes      |            |              |        |       |
| Interactive session (e.g., clickers, think-pair-share) |            |              |        |       |
| Practical sessions: hands-on computer lab exercises    |            |              |        |       |
| Tutorials, handouts, and guides (print or electronic)  |            |              |        |       |
| Individualized instruction                             |            |              |        |       |
| Formal mentor/coach/preceptor built into program       |            |              |        |       |
| During the course of clinical care in clinical setting |            |              |        |       |
| Other                                                  |            |              |        |       |

If other, please describe...

---

8. How often do you use live web-based instructional tools when teaching this approach?

|                           | Frequently | Occasionally | Rarely | Never |
|---------------------------|------------|--------------|--------|-------|
| Webinar/videoconferencing |            |              |        |       |
| Chat                      |            |              |        |       |
| Smartboards               |            |              |        |       |
| Other                     |            |              |        |       |

If other, please describe...

---

9. How often do you use *any time* web-based instructional tools when teaching this approach?

|                                                             | Frequently | Occasionally | Rarely | Never |
|-------------------------------------------------------------|------------|--------------|--------|-------|
| Online tutorials                                            |            |              |        |       |
| Discussion boards                                           |            |              |        |       |
| Course management software (e.g., Angel, WebCT, BlackBoard) |            |              |        |       |
| Email or email discussion lists                             |            |              |        |       |
| Streaming video or screencasts                              |            |              |        |       |
| Other                                                       |            |              |        |       |

If other, please describe...

---

Thank you for completing the survey.

Please click the Finish button to submit your survey results.
