# Supplementary material
Source: PubMed Central journal article supplement (PMC4076132)
Supplement: 10.3163.1536-5050.102.3.013.sg002.pdf [file 10.3163.1536-5050.102.3.013.sg002.pdf]

## **Evidence-based practice instruction by faculty members and librarians in North American optometry and ophthalmology programs**

**Katherine A. MacDonald, BA, BSc, MLIS; Patricia K. Hrynchak, OD, FAAO; Marlee M. Spafford, OD, PhD, FAAO**

### **APPENDIX B**

#### **Evidence-based clinical practice instruction in optometry and ophthalmology programs survey**

Welcome and thank you in advance for completing the survey.

As indicated by the email information letter, the researchers who created this survey are interested in how you teach evidence-based clinical practice (EBCP). The term EBCP will be used in this survey to denote all variations in terminology used by different health care professions including evidence-based medicine (EBM), evidence-based practice (EBP), evidence-informed practice (EIP). The definition of EBCP we will use is the standard EBM definition:

“the conscientious, explicit and judicious use of current best evidence in making decisions about the care of individual patients. The practice of evidence-based medicine requires the integration of individual clinical expertise with the best available external clinical evidence from systematic research and our patient’s unique values and circumstances.”

Source: Straus SE, Richardson WS, Glasziou P, Haynes RB. Evidence-based medicine: how to practice and teach EBM. 3rd ed. Edinburgh, Scotland, UK: Elsevier Churchill Livingstone; 2005.

The five steps of EBCP are:

Step 1: Ask: converting the need for information into an answerable question

Step 2: Acquire: finding the best evidence with which to answer the question

Step 3: Appraise: critically appraising the evidence for validity, impact, and applicability

Step 4: Apply: integrating the critically appraised evidence with clinical expertise and patient values etc.

Step 5: Assess: evaluating our own effectiveness

Source: Straus SE, Richardson WS, Glasziou P, Haynes RB. Evidence-based medicine: how to practice and teach EBM. 3rd ed. Edinburgh, Scotland, UK: Elsevier Churchill Livingstone; 2005.

Prasad K. Fundamentals of evidence-based medicine: basic concepts in easy language. New Delhi, India: Meeta Publishers; 2007.

**Part A: Background information**

1. What is your educational background? [check as many as apply]

|                                                                                                     |  |
|-----------------------------------------------------------------------------------------------------|--|
| Master of library and information science, master of information science, master of library science |  |
| Library technician                                                                                  |  |
| Optometrist                                                                                         |  |
| PhD                                                                                                 |  |
| Family physician                                                                                    |  |
| Specialist physician (e.g., ophthalmologist)                                                        |  |
| Resident (family medicine or specialty training)                                                    |  |
| Graduate student (master or PhD)                                                                    |  |
| Other                                                                                               |  |

If other, please describe...

SKIP LOGIC: Depending on the response to the answer of question 1, the respondent will be taken to a one of two surveys that ask the same questions but may have been slightly adapted to suit the language or roles of one of two groups: librarians or faculty/staff.  
**Librarian version** – see below

**Librarian survey**

**About you**

2. What kind of program do you support as a librarian?

|                                               |  |
|-----------------------------------------------|--|
| Optometry                                     |  |
| Ophthalmology                                 |  |
| Other (e.g., medical undergraduate, hospital) |  |

If other, please describe...

3. How long have you been involved in teaching as a librarian? \_\_\_\_\_ years

4. How much of your workload is devoted to library services for optometry or ophthalmology?  
\_\_\_\_\_ (approximate percentage)

**About your academic institution**

5. Which one of the following describes your program?

|                                                        |  |
|--------------------------------------------------------|--|
| An professional program within a university or college |  |
| A standalone educational institution                   |  |
| Hospital                                               |  |
| Other                                                  |  |

If other, please describe...

---

**About your library**

6. How would you best describe your library? [check one box only]

|                                                               |  |
|---------------------------------------------------------------|--|
| Discipline/department specific library (e.g., optometry only) |  |
| Multidisciplinary health sciences library                     |  |
| Multidisciplinary science library                             |  |
| General academic library                                      |  |
| Other                                                         |  |

If other, please describe ....

---

7. Approximately how many professional students does your library serve? (e.g., if you are a branch or departmental library how many students are associated with your program)

\_\_\_\_\_ users

8. What is your educational background with respect to learning the process of EBCP? [check all that apply]

|                                                                                                                |  |
|----------------------------------------------------------------------------------------------------------------|--|
| It was part of my professional training program                                                                |  |
| I have taken courses on EBCP as part of a postgraduate degree                                                  |  |
| I have taken a course or courses in the area outside of a degree program for personal/professional development |  |
| Self-directed learning                                                                                         |  |
| None                                                                                                           |  |
| Other                                                                                                          |  |

If other, please describe ....

---

9. Do you teach *any of the steps* of the EBCP process? Yes    No

If *yes* continue to question #10 (below) and complete sections B, C, D, E, F  
If *no* please go to page # 10 and complete sections G, H

**Part B: Teaching evidence-based clinical practice (EBCP)**

10. Which aspects of the EBCP process do you teach? [check all that apply]

|                                                                                                              |  |
|--------------------------------------------------------------------------------------------------------------|--|
| Step 1: Ask: converting the need for information into an answerable question                                 |  |
| Step 2: Acquire: finding the best evidence with which to answer the question                                 |  |
| Step 3: Appraise: critically appraising the evidence for validity, impact, and applicability                 |  |
| Step 4: Apply: integrating the critically appraised evidence with clinical expertise and patient values etc. |  |
| Step 5: Assess: evaluating your own effectiveness                                                            |  |
| Other                                                                                                        |  |

If other, please describe...

---

11. How often do you teach EBCP to the following learners? [check all that apply]

|                                          | Frequently | Occasionally | Rarely | Never |
|------------------------------------------|------------|--------------|--------|-------|
| Optometry students                       |            |              |        |       |
| Medical students (pregraduate learners)  |            |              |        |       |
| Ophthalmology residents                  |            |              |        |       |
| Other medical residents and fellows      |            |              |        |       |
| Graduate students (master and PhD level) |            |              |        |       |
| Faculty members                          |            |              |        |       |
| Continuing education participants        |            |              |        |       |
| Other                                    |            |              |        |       |

If other, please list:

---

**Part C: How and where you teach EBCP**

12. Indicate the frequency that you use the following formats to teach EBCP.

|                                                                                                              | Frequently | Occasionally | Rarely | Never |
|--------------------------------------------------------------------------------------------------------------|------------|--------------|--------|-------|
| As part of a course (face-to-face or online)                                                                 |            |              |        |       |
| A workshop not linked to a specific course but linked to a program (e.g., milestone for program requirement) |            |              |        |       |
| Via an independent workshop that students voluntarily take with no credit/requirement attached               |            |              |        |       |
| One-on-one instruction/consultation                                                                          |            |              |        |       |
| Continuing education course                                                                                  |            |              |        |       |
| Other                                                                                                        |            |              |        |       |

If other, please describe...

---

13. In total, how many hours do you spend teaching EBCP in a year?

|                   |  |
|-------------------|--|
| Less than 2 hours |  |
| 2–5 hours         |  |
| 6–10 hours        |  |
| 11–15 hours       |  |
| 16–20 hours       |  |
| 21+ hours         |  |
| Other             |  |

If other, please describe...

---

14. How often do you teach EBCP in the following settings?

|                                                              | Frequently | Occasionally | Rarely | Never |
|--------------------------------------------------------------|------------|--------------|--------|-------|
| Large lecture hall/large classroom (>100 seats)              |            |              |        |       |
| Small classroom (30–100 seats)                               |            |              |        |       |
| Seminar room (1–29 seats)                                    |            |              |        |       |
| Computer lab                                                 |            |              |        |       |
| Office consultation                                          |            |              |        |       |
| Virtual (web-based/online/remote/course management software) |            |              |        |       |
| Clinical setting                                             |            |              |        |       |
| Other                                                        |            |              |        |       |

If other, please list...

---

15. How often do you use the following instructional methods when teaching EBCP?

|                                                        | Frequently | Occasionally | Rarely | Never |
|--------------------------------------------------------|------------|--------------|--------|-------|
| Lecture                                                |            |              |        |       |
| Small group problem-based learning                     |            |              |        |       |
| Small group case-based learning                        |            |              |        |       |
| Discussion within in lecture                           |            |              |        |       |
| Case discussion (e.g., grand rounds)                   |            |              |        |       |
| Journal club                                           |            |              |        |       |
| Live demonstration of tools, resources, processes      |            |              |        |       |
| Interactive session (e.g., clickers, think-pair-share) |            |              |        |       |
| Practical sessions: hands-on computer lab exercises    |            |              |        |       |
| Tutorials, handouts, and guides (print or electronic)  |            |              |        |       |
| Individualized instruction                             |            |              |        |       |

|                                                        |  |  |  |  |
|--------------------------------------------------------|--|--|--|--|
| Formal mentor/coach/preceptor built into program       |  |  |  |  |
| During the course of clinical care in clinical setting |  |  |  |  |
| Other                                                  |  |  |  |  |

If other, please describe...

---

16. How often do you use *live* web-based instructional tools when teaching EBCP?

|                           | Frequently | Occasionally | Rarely | Never |
|---------------------------|------------|--------------|--------|-------|
| Webinar/videoconferencing |            |              |        |       |
| Chat                      |            |              |        |       |
| Smartboards               |            |              |        |       |
| Other                     |            |              |        |       |

If other, please describe...

---

17. How often do you use *any time* web-based instructional tools when teaching EBCP?

|                                                             | Frequently | Occasionally | Rarely | Never |
|-------------------------------------------------------------|------------|--------------|--------|-------|
| Online tutorials/modules                                    |            |              |        |       |
| Discussion boards                                           |            |              |        |       |
| Course management software (e.g., Angel, WebCT, BlackBoard) |            |              |        |       |
| Email or email discussion lists                             |            |              |        |       |
| Streaming video or screencasts                              |            |              |        |       |
| Other                                                       |            |              |        |       |

If other, please describe...

---

18. Have you created any teaching aids or tools to assist in the teaching of EBCP? [check all that apply]

|                                 |  |
|---------------------------------|--|
| Question development worksheets |  |
| Search strategy worksheets      |  |
| Critical appraisal worksheets   |  |
| EBCP resource lists             |  |
| EBCP subject guides             |  |
| Other                           |  |

If other, please describe...

---

19. What are your preferred reference sources or textbooks?

---

**Part D: Instructional collaboration**

20. How often are the following individuals involved with you in teaching EBCP?

|                                                  | Frequently | Occasionally | Rarely | Never |
|--------------------------------------------------|------------|--------------|--------|-------|
| Faculty member(s)                                |            |              |        |       |
| Librarian(s)                                     |            |              |        |       |
| Someone other than a faculty member or librarian |            |              |        |       |

If someone other than a faculty member or librarian, please describe...

---

21. Identify any campus support services you have accessed to help your course development in the teaching of EBCP. [check all that apply]

|                                           |  |
|-------------------------------------------|--|
| Teaching Support Centre                   |  |
| Instructional Technologies Support Centre |  |
| Other                                     |  |

If other, please describe...

---

22. How often do you engage with faculty members with respect to teaching EBCP?

|                                                                                                                            | Frequently | Occasionally | Rarely | Never |
|----------------------------------------------------------------------------------------------------------------------------|------------|--------------|--------|-------|
| You co-teach in classrooms or computer labs                                                                                |            |              |        |       |
| You discuss course structure, formats, approaches, and content (assignments, etc.) with faculty member(s) outside of class |            |              |        |       |
| You are requested by faculty member(s) to teach specific sessions on specific topics, and they are not present in class    |            |              |        |       |
| You teach together in the clinical setting                                                                                 |            |              |        |       |
| Other                                                                                                                      |            |              |        |       |

If other, please describe...

---

23. Do you have any additional comments on engaging with faculty members with respect to teaching EBCP?

---

**Part E: Assessment**

24. How often are the following strategies used to assess student learning with respect to EBCP?

|                                                                                                                                                                                                             | Frequently | Occasionally | Rarely | Never | Don't know |
|-------------------------------------------------------------------------------------------------------------------------------------------------------------------------------------------------------------|------------|--------------|--------|-------|------------|
| Critically appraised topic (CAT) reports                                                                                                                                                                    |            |              |        |       |            |
| Case study reports (e.g., grand rounds, journal club)                                                                                                                                                       |            |              |        |       |            |
| Library research assignments involving self-evaluation of research process and skills                                                                                                                       |            |              |        |       |            |
| Questions on final examinations (multiple choice/short answer/essay)                                                                                                                                        |            |              |        |       |            |
| Quizzes                                                                                                                                                                                                     |            |              |        |       |            |
| EBCP worksheets                                                                                                                                                                                             |            |              |        |       |            |
| Critical appraisal exercises                                                                                                                                                                                |            |              |        |       |            |
| Part of clinical examinations (e.g., one task in a 10-step clinical exam—involves being marked on the search & appraisal done to make a clinical decision with respect to a case of a standardized patient) |            |              |        |       |            |
| Questionnaire on clinical behaviours/attitudes                                                                                                                                                              |            |              |        |       |            |
| Portfolios                                                                                                                                                                                                  |            |              |        |       |            |
| Observation of clinical practices                                                                                                                                                                           |            |              |        |       |            |
| Other                                                                                                                                                                                                       |            |              |        |       |            |

If other, please describe...

25. How often are you involved in the creation of the following student assessment tools related to EBCP?

|                                                                                                              | Frequently | Occasionally | Rarely | Never |
|--------------------------------------------------------------------------------------------------------------|------------|--------------|--------|-------|
| Develop and mark assignments                                                                                 |            |              |        |       |
| Develop and mark a portion of assignments                                                                    |            |              |        |       |
| Mark a portion of assignments developed by the faculty member (e.g., search strategy, bibliography)          |            |              |        |       |
| Develop and mark quizzes or exam questions                                                                   |            |              |        |       |
| Develop and mark worksheets or exercises                                                                     |            |              |        |       |
| Develop and create marking schemes for assignments, exam, quizzes, worksheets, or exercises that others mark |            |              |        |       |



|       |  |  |  |  |
|-------|--|--|--|--|
| Other |  |  |  |  |
|-------|--|--|--|--|

If other, please describe...

**Part F: School/program support for EBCP**

26. Please indicate your degree of agreement or disagreement you have with the following

|                                                                                                                                                                 | Strongly agree | Agree | Somewhat agree | Somewhat disagree | Disagree | Strongly disagree | Don't know |
|-----------------------------------------------------------------------------------------------------------------------------------------------------------------|----------------|-------|----------------|-------------------|----------|-------------------|------------|
| EBCP is formally integrated into the mission statements, goals, and objectives of the program.                                                                  |                |       |                |                   |          |                   |            |
| EBCP is formally integrated into the curriculum as a milestone or some other graduation requirement.                                                            |                |       |                |                   |          |                   |            |
| EBCP is formally part of the learning objectives of one or more courses.                                                                                        |                |       |                |                   |          |                   |            |
| EBCP is informally taught in one or more courses but at the discretion of faculty (i.e., it is not formally mandated and therefore can be removed from course). |                |       |                |                   |          |                   |            |
| EBCP is formally integrated into the learning objectives of clinics and taught by clinical supervisors during clinical interactions with students.              |                |       |                |                   |          |                   |            |
| EBCP is taught by clinical supervisors, at their own discretion, during clinical interactions with students.                                                    |                |       |                |                   |          |                   |            |

|                                                                       |  |  |  |  |  |  |  |
|-----------------------------------------------------------------------|--|--|--|--|--|--|--|
| EBCP is taught in the library during reference/consultation sessions. |  |  |  |  |  |  |  |
|-----------------------------------------------------------------------|--|--|--|--|--|--|--|

If none of the above apply, please comment...

Thank you for completing the survey.

Please click the Finish button to submit your survey results.

**Part G: For those who answered *no* to the question #10 (whether or not they taught EBCP)**

1. If you do not teach any part of the EBCP process, do you teach students another approach to finding and/or using research to support their clinical decision making?

Yes                      No

2. What do you teach? [Textbox]

3. How often do you teach this approach to the following learners? [check all that apply]

|                                         | Frequently | Occasionally | Rarely | Never |
|-----------------------------------------|------------|--------------|--------|-------|
| Optometry students                      |            |              |        |       |
| Medical students (pregraduate learners) |            |              |        |       |
| Ophthalmology residents                 |            |              |        |       |
| Other medical residents and fellows     |            |              |        |       |
| Graduate students (master & PhD level)  |            |              |        |       |
| Faculty members                         |            |              |        |       |
| Professionals in the community          |            |              |        |       |
| Other                                   |            |              |        |       |

If other, please describe...

**Part H: How and where you teach**

4. Indicate the frequency that you use the following formats when teaching this approach.

|                                                                                                              | Frequently | Occasionally | Rarely | Never |
|--------------------------------------------------------------------------------------------------------------|------------|--------------|--------|-------|
| As part of a course (face-to-face or online)                                                                 |            |              |        |       |
| A workshop not linked to a specific course but linked to a program (e.g., milestone for program requirement) |            |              |        |       |
| Via an independent workshop that students voluntarily take with no credit/requirement attached               |            |              |        |       |

|                                     |  |  |  |  |
|-------------------------------------|--|--|--|--|
| One-on-one instruction/consultation |  |  |  |  |
| Continuing education course         |  |  |  |  |
| Other                               |  |  |  |  |

If other, please describe...

5. In total, how many hours do you spend teaching this approach in a year?

|                   |  |
|-------------------|--|
| Less than 2 hours |  |
| 2-5 hours         |  |
| 6-10 hours        |  |
| 11-15 hours       |  |
| 16-20 hours       |  |
| 21+ hours         |  |
| Other             |  |

If other, please describe...

6. How often do you teach in the following settings when teaching this approach?

|                                                              | Frequently | Occasionally | Rarely | Never |
|--------------------------------------------------------------|------------|--------------|--------|-------|
| Large lecture hall/large classroom (>100 seats)              |            |              |        |       |
| Small classroom (30-100 seats)                               |            |              |        |       |
| Seminar room (1-29 seats)                                    |            |              |        |       |
| Computer lab                                                 |            |              |        |       |
| Office consultation                                          |            |              |        |       |
| Virtual (web-based/online/remote/course management software) |            |              |        |       |
| Clinical setting                                             |            |              |        |       |
| Other                                                        |            |              |        |       |

If other, please list...

7. How often do you use the following instructional methods when teaching this approach?

|                                                   | Frequently | Occasionally | Rarely | Never |
|---------------------------------------------------|------------|--------------|--------|-------|
| Lecture                                           |            |              |        |       |
| Small group problem-based learning                |            |              |        |       |
| Small group case-based learning                   |            |              |        |       |
| Discussion within in lecture                      |            |              |        |       |
| Case discussion (e.g., grand rounds)              |            |              |        |       |
| Journal club                                      |            |              |        |       |
| Live demonstration of tools, resources, processes |            |              |        |       |

|                                                        |  |  |  |  |
|--------------------------------------------------------|--|--|--|--|
| Interactive session (e.g., clickers, think-pair-share) |  |  |  |  |
| Practical sessions: hands-on computer lab exercises    |  |  |  |  |
| Tutorials, handouts, and guides (print or electronic)  |  |  |  |  |
| Individualized instruction                             |  |  |  |  |
| Formal mentor/coach/preceptor built into program       |  |  |  |  |
| During the course of clinical care in clinical setting |  |  |  |  |
| Other                                                  |  |  |  |  |

If other, please describe...

---

8. How often do you use *live* web-based instructional tools when teaching this approach?

|                           | Frequently | Occasionally | Rarely | Never |
|---------------------------|------------|--------------|--------|-------|
| Webinar/videoconferencing |            |              |        |       |
| Chat                      |            |              |        |       |
| Smartboards               |            |              |        |       |
| Other                     |            |              |        |       |

If other, please describe...

---

9. How often do you use *any time* web-based instructional tools when teaching this approach?

|                                                             | Frequently | Occasionally | Rarely | Never |
|-------------------------------------------------------------|------------|--------------|--------|-------|
| Online tutorials/modules                                    |            |              |        |       |
| Discussion boards                                           |            |              |        |       |
| Course management software (e.g., Angel, WebCT, BlackBoard) |            |              |        |       |
| Email or email discussion lists                             |            |              |        |       |
| Streaming video or screencasts                              |            |              |        |       |
| Other                                                       |            |              |        |       |

If other, please describe...

---

Thank you for completing the survey.

Please click the Finish button to submit your survey results.
